1                   **How effective are frogs in regulating crop pest population in a natural**  
2                   **multi-trophic system??**

3

4

5                   Deyatima Ghosh<sup>1</sup>, Sabyasachi Chatterjee<sup>2</sup> and Parthiba Basu<sup>1</sup>

6

7

8                   <sup>1</sup>Department of Zoology, University of Calcutta, 35, Ballygunge Circular Road, Kolkata,

9                   700-019, e-mail: [bparthib@gmail.com](mailto:bparthib@gmail.com)

10                  <sup>2</sup> Ongil, 79D3, Sivaya Nagar, Reddiyar, Alagapuram, Salem, 636-004, India

11                  e-mail: [chatsab99@gmail.com](mailto:chatsab99@gmail.com)

12

13

14                  \*Corresponding Author: Parthiba Basu

15                  Address: Department of Zoology

16                                   University of Calcutta

17                                   35, Ballygunge Circular Road

18                                   Kolkata-700019

19                  Email: [bparthib@gmail.com](mailto:bparthib@gmail.com)

20

21

22

23

24

25

26

27

28

29

30

31

32 **Abstract**

33 Abstract:

34 Potential of frogs as important natural pest control agents has been highlighted earlier. But  
35 the effectiveness of frogs in regulating the pest load in intensive agricultural landscape in a  
36 multi-trophic system is not clear. We performed controlled field experiment in paddy field  
37 with a varying density (observed in high and low agricultural intensity (AI) areas) of a  
38 commonly found frog species and compared the pest and pest predator build-up. The  
39 consumption rate of the model amphibian was studied using enclosure experiment. The  
40 consequent trophic cascade effect of frogs on both crop pest and other arthropod pest  
41 predator was analyzed using mathematical population growth models. Although frogs  
42 consumed pests, they could not reduce crop pest abundance. although a lesser frog density  
43 found in high AI areas significantly affected the pest predator abundance. Based on the  
44 functional response result, mathematical growth models demonstrated that with a constant  
45 harvesting factor (Holling's Type II) frogs will always have a negative impact on the beneficial  
46 natural enemy population due to intraguild predation thereby limiting its potential as a pest  
47 regulator. Our study challenges the notion of frogs as an effective pest control agent and  
48 argues that increasing habitat diversity might improve overall biological pest suppression.

49 Keywords: Frogs, Biological Pest regulation, Functional response, Intraguild predation, Trophic  
50 cascade effect

51

52

53

54

55

56

57

58

59

60

61

62 1. INTRODUCTION

63 Extensive use of agro-chemicals and habitat loss associated with agricultural intensification  
64 has been identified as a major driver of biodiversity loss in agricultural landscape (Dudley  
65 and Alexander, 2017; Balmford et al., 2012; Newbold et al., 2015; IUCN, 2014; Lajmanovich  
66 et al., 2003). The negative impact of biodiversity loss on Ecosystem Service (ES) delivery in  
67 agriculture has also been recognized widely (Brook et al., 2008; Tscharntke et al., 2005).  
68 Ecological Intensification (EI) of agriculture on the other hand has been suggested as a  
69 sustainable solution to conventional high external agro-chemical input-driven intensive  
70 agriculture (Tittonell, 2014). EI involves restoration or improvement of the ES provisions in  
71 agriculture e.g., crop pollination, biological control of crop pests, or soil biological activities.  
72 However, there exists a serious gap in our scientific understanding about the underlying  
73 ecological processes that generate ES (Firbank et al., 2013; Birkhofer et al., 2015; Naeem et  
74 al., 2015; Bengtsson, 2015).

75

76 Biological control of crop pests is a key ES (Bengtsson, 2015; Ives et al., 2000; Wilby and  
77 Thomas, 2002; Gurr et al., 2003). However, despite years of research, our understanding of  
78 the underlying ecological processes that govern biological control, particularly, the complex  
79 food web interactions that regulate the process, is still incomplete (Thies et al., 2005;  
80 Bengtsson, 2015). Contrary to the benefits obtained from natural enemy population, several  
81 studies have highlighted the detrimental effects it may have on the non-target population  
82 (Clarke et al., 1984; Howarth, 1983, 1991). Hence any biological pest control strategy  
83 warrants thorough scrutiny of the trophic cascade in a multi-species system.

84

85 Amphibians have long been recognized as potential natural predators for crop pests (Hamer  
86 et al., 2004; Knutson et al., 2004; Gibbs et al., 2005; Loman and Lardner, 2006) being both  
87 generalist and opportunist predator (Kathiwada, 2016; Schaefer et al., 2006; Mahan and  
88 Johnson, 2007). The importance of amphibians in biological control, particularly in rice  
89 cultivation has been particularly recognized (Li et al., 2008; Zhang et al., 2010; An et al.,  
90 2012; Zhang, 2013). A sizeable abundance of amphibians is suggested to be efficient in  
91 bringing down the rice pest population (Teng, et al, 2016; Fang et al., 2019). Kathiwada  
92 (2016) reported a high proportion of rice pests in frogs' diet and recommended the  
93 introduction of frogs as biological pest control in rice fields. Intensive agriculture has been  
94 found to negatively impact frog population (Arntzen et al. 2017; Davies et al. 2018). Ghosh  
95 and Basu (2020) reported reduced density of amphibian fauna in areas of high agricultural  
96 intensification compared to low agricultural intensity areas. A decline in frog population in an  
97 intensive agricultural landscape is therefore expected to impact ES delivery in rice fields.

98

99 However, most studies that reported the potential of frogs as pest regulators have not looked  
100 at the effect frogs may have on non-target species especially beneficial natural arthropod pest  
101 predators. These studies also have not investigated if frog predation of rice pests could  
102 effectively bring down pest population through controlled multi-trophic field experiments.

103

104 The extent to which predation can regulate the prey population is influenced by the functional  
105 response of the predator to changing prey density (Leeuwen et al., 2007; Williams and  
106 Martinez, 2004; Wollrab and Diehl, 2015). It is therefore important to gain insights into the  
107 functional response of frogs to changing density of rice pests before coming to a conclusion  
108 about their effectiveness as rice pest regulator. However, none of the studies that prescribed  
109 frogs as potential regulators of crop pests has considered this.

110 The present study attempts to bridge these gaps by testing the efficiency of frogs in regulating  
111 crop pest population through a multi-trophic controlled field experiment conducted at the  
112 Agricultural Experimental Farm, University of Calcutta, West Bengal, India using a focal  
113 frog species available commonly in the agricultural fields across India. The experiment was  
114 designed with field-realistic densities of frogs found in the high and low agricultural intensity  
115 areas in the study region reported earlier by Ghosh and Basu (2020). Therefore, apart from  
116 answering if frogs are efficient regulators of rice pests, the study also explores the impact of  
117 agricultural intensification on ES delivery by frogs. We also assess the functional response of  
118 the focal frog species to varying densities of a common rice pest in the study region. We also  
119 predict if the focal frog species can be an efficient pest regulator in a multi-trophic system  
120 using a mathematical model based on our results.

121

## 122 **2. Materials and Methods**

### 123 **2.1 Experiment Site**

124 The experiment was performed in the Agricultural Experimental Farm, University of  
125 Calcutta, Baruipur Campus in West Bengal in 2018 (22.3787°N, 88.4361°E). The farm is  
126 spread across an area of 210 acres with paddy being the major crop grown during the  
127 monsoon. Total experimental area was 7,500 square meter. The follow-up mesocosm  
128 experiment to study the nature of feeding response in amphibians was performed in the  
129 University campus.

### 130 **2.2 Experimental design**

131 Three blocks of 50 X 50 meters area were selected to carry out the study. Each of the blocks  
132 was divided into 6 experimental plots of 10 X 10 meters where we installed our experimental  
133 units using drift fence of length 10m and height 3ft. Thus we installed a total of 18  
134 experimental plots across an area of 7500 m<sup>2</sup>. We left a buffer of 5m between each

135 experimental plot. We randomly assorted the plots to three different frog treatments which  
136 were - one control without frogs, one with a treatment density of 10 frogs / 100 m<sup>2</sup> as  
137 observed in low agricultural intensification and third with a treatment of 5 frogs / 100 m<sup>2</sup>  
138 representing the density observed in high agricultural intensification zones (density data  
139 obtained from a study conducted in Odisha along an agricultural intensification gradient,  
140 Ghosh and Basu, 2020).

### 141 **2.3 Experimental model**

142 We used adult (5-6 cm) paddy field frogs or *Fejervarya limnocharis* as our model organism  
143 as they are the most dominant in paddy fields of India (Dash and Mahanta, 1993). They are  
144 prevalent in South Asia (Sumida et al., 2007). This species is also a generalist and feeds  
145 mainly on insects (Chuang and Borzee, 2019) hence makes it a potential bioresource to test  
146 their pest controlling efficiency. Apart from these, the species is categorized as least concern  
147 by IUCN (IUCN, Conservation International and NatureServe, 2006), hence our study did not  
148 put any undue extinction pressure. We collected amphibians by active search in August 2018  
149 from within the campus area for release in experimental plots.

### 150 **2.4 Experimental plot preparation**

151 We selected paddy fields for its economic demand and the huge swathe of land under paddy  
152 cultivation and used a local rice cultivar named “Patnai”.

153 We prepared the seedbed on 30<sup>th</sup> June at a density of 1916 seeds/ m<sup>2</sup> for a total seedbed area  
154 of 210 m<sup>2</sup>. Paddy saplings were transplanted around 30 days after preparing seedbed from 27  
155 to 29 July 2018 at an average density of 762 plants/100 m<sup>2</sup>. Before releasing the frogs, all  
156 pots were covered with a mesh net of 48mm gap size to exclude predation risk on both the  
157 pests and experimental frogs by birds as well as to prevent the escape of any frogs from the  
158 experimental enclosures. Plots were left undisturbed for 15 days before the release of frogs.  
159 Frogs were released on August 15<sup>th</sup>, 2018, after sunset when the temperature was low to

160 prevent desiccation. After leaving the system undisturbed in order to allow the animals to  
161 overcome any stress during their release process, we started sampling from August 20<sup>th</sup>,  
162 2018. No pesticides, herbicides, or any fertilizers were applied in the plots to eliminate any  
163 detrimental effects on animals. The study continued throughout the vegetative phase until the  
164 flower stage and crops were harvested at end of November 2018.

165

## 166 **2.5 Arthropod sampling**

167 All active and passive sampling was conducted from 6.00 hr to 13.00 hr of a day. For insect  
168 sampling, we used the sweep netting method (Fatahuddin et al., 2020) with a standard-sized  
169 sweep net of 24 inches length and an opening diameter of 12 inches. Sweep netting was done  
170 10 times along each of the four sides of the experimental plots making a total of 40 sweeps  
171 per plot. All specimens collected were wet preserved in 70% alcohol for later identification  
172 and categorization.

173

### 174 **Passive sampling: Pest Infestation study**

175 We used a 1 X 1 meter wooden frame and placed it randomly within an experimental plot.  
176 For each sampling, data on the total number of plants and total number of leaves were  
177 collected. We selected 3 random plants within each such quadrat and inspected proportion of  
178 infestation (Teng et al., 2016) by rice hispa (*Dicladispa sp.*), leaf folder (*Cnaphalocrocis*  
179 *sp.*), defoliation, tungro, rice whorl maggot (*Hydrellia sp.*). For leaves where we could not  
180 identify the infestation, were collected and preserved for later identification under expert  
181 supervision. At each quadrat, we also searched for the presence of any pest or predator and  
182 wet preserved the specimen in 70% alcohol for later identification. This method was  
183 replicated 5 times for each plot per sampling.

184 We maintained the same sequence of sampling for the different treatments (6 plots for each  
185 treatment) and pooled observations from 6 plots per treatment in each complete sampling  
186 session. We averaged data for further statistical analysis and data representation. All the  
187 samplings were repeated four times for each plot throughout the paddy growing season. This  
188 covered all the successive stages of rice cultivation following transplantation to flowering  
189 stage.

## 190 **2.6 Estimating the frog survival**

191 From 17.00 hr to 21.00 hr every day we counted the frogs and checked for any dead or  
192 desiccated frog inside the experimental plot to ensure that the number of frogs remained  
193 constant.

194

## 195 **2.7 Arthropod Identification**

196 We identified all arthropods obtained in active sampling up to genus level and broadly  
197 grouped them into orders to categorize them as pests and non-pest natural predators (Khan  
198 and Pathak, 1994; NICRA, 2011) for the purpose of this present study.

199

## 200 **2.8 Experiment to study the feeding potential in this species**

201 We performed a mesocosm experiment with one size class of frogs (5-6cm, adult) and three  
202 prey densities of 8, 33, and 43. We used grasshoppers in this experiment as they are one of  
203 the major paddy defoliators. Our field observation also showed the model amphibian feeding  
204 on the grasshopper. The densities of grasshopper used were replicates from control treatments  
205 of the field experiment (observed grasshopper densities were 8, 33, 43 and 44). The entire  
206 experiment was replicated four times through the months of September till November 2019.  
207 On the day of the experiment, one predator was transferred to the experimental mesocosm of  
208 1x1 meter that was designed to mimic the natural environment of these predators. Health of



209 the mesocosm was maintained regularly. Total experimental time was set for 17 hr. At the  
210 end of the experiment, we removed the predator and counted the remaining prey. All  
211 predators had the same starvation period before they performed in an experiment. Since they  
212 feed on live prey we also maintained a separate terrarium for the prey at varying densities to  
213 check the mortality rate in 24 hr and found no death over the period.

214 To collect data on the handling time and attack rate of frogs, we replicated the experiment  
215 with varying prey densities and recorded the feeding rates for 30min with a video camera  
216 (Nikon 5200D) fitted outside the terrarium.

217

## 218 **2.9 Statistical analysis**

219 We performed a Kruskal-Wallis test to compare the difference in the number of transplanted  
220 seedlings.

221 Proportion of pest infestation by 5 major paddy pests was checked using nested ANOVA  
222 with a mixed-effects model where sampling phases and frog treatments were the fixed effects  
223 and treatment within blocks was included as random effects. Comparison of means was  
224 performed for both the fixed effects. We checked the significance of the random effects by  
225 comparing the above described model with a second model containing only the fixed effects.

226 For total pest and pest predator count, a Generalized Linear Mixed Model (GLMM) with  
227 negative binomial error distribution was applied to check their abundance with varying  
228 phases of the paddy growth and frog treatments (Alexander et al., 2000; Linden and  
229 Mantyniemi, 2011; Ghosh and Basu, 2020). The model structure was the same as that of the  
230 nested ANOVA.

231 We performed a diagnostic test for the functional response (Pritchard et al., 2017) with prey  
232 eaten as a function of prey provided. Based on the result we created a final model with attack  
233 rate and handling time.

234 We used R software (version 3.5.2) (R Core Team, 2018) to perform all the analyses using  
 235 packages- nlme, Mass, lmtest, multcomp, lme4, frair.

236 **2.10 Mathematical Growth Model:**

237 In the presence of  $n$  number of frogs, the pest and pest predator dynamics will vary  
 238 depending on the consumption rate of these frogs (provided the resource available to the crop  
 239 pests is constant across the three treatments) and also by their mutual birth and death  
 240 processes in which the predator-prey interaction plays an important role.

241 We designate,  $x_1$  = number of pests and  $x_2$  = number of pest predators while “ $n$ ” number of  
 242 frogs act as predators for both the crop pests and the crop pest predators.

243 Since this frog species is a generalist, it does not have any preference for crop pests or  
 244 predators, and its feeding process is assumed to be a random one, with a total mass “ $m$ ” being  
 245 consumed in “ $T$ ” time, from a “meal” that consists of prey and predator, for which the model  
 246 is assumed to be as follows.

247

248 **Model of frog predation on crop pest and predator:** It is clear from the above that if frogs  
 249 were to feed exclusively on pests, it would need to eat  $n_1 = (m/m_1)$  pests while if it were to  
 250 feed exclusively on the predator, it would consume  $n_2 = (m/m_2)$  predators where  $m_1$  and  $m_2$   
 251 are the mass of pest and pest predator respectively. These can be satisfied with “success  
 252 rates” that are proportional to  $N_1 = (x_1/n_1)$  and  $N_2 = (x_2/n_2)$  respectively and would occur with  
 253 relative chances  $P_1$  and  $P_2$  given by,

254 
$$P_1 = N_1 / (N_1 + N_2) = \frac{x_1/n_1}{x_1/n_1 + x_2/n_2} = \frac{\frac{m_1 x_1}{m}}{\frac{m_1 x_1}{m} + \frac{m_2 x_2}{m}} = \frac{m_1 x_1}{m_1 x_1 + m_2 x_2} \quad \dots\dots\dots 1$$

255 
$$P_2 = 1 - P_1 = \frac{m_2 x_2}{m_1 x_1 + m_2 x_2} \quad \dots\dots\dots 1.1$$

256 Thus with  $n$  number of frogs present, the consumption rate of pests is :

257 
$$(n n_1 P_1) / T = \frac{nm/T}{m_1} \cdot \frac{m_1 x_1}{m_1 x_1 + m_2 x_2} \quad \dots\dots\dots (2.1)$$

258 and the consumption rate for predators is

259 
$$(nn_2P_2)/T = \frac{nm/T}{m_2} \cdot \frac{m_2x_2}{m_1x_1+m_2x_2} \dots\dots\dots(2.2)$$

260 The evolution equations of the pest and predator are then,

261 
$$\frac{dx_1}{dt} = a_1x_1 - b_1x_1x_2 - \frac{(\frac{nm}{T})x_1}{m_1x_1+m_2x_2} \dots\dots\dots(3)$$

262 
$$\frac{dx_2}{dt} = - a_2x_2 + b_2x_1x_2 - \frac{(\frac{nm}{T})x_2}{m_1x_1+m_2x_2} \dots\dots\dots(4)$$

263 For Eq (3), the first term is the natural birth rate of the pest while the second term is their  
264 death rate due to feeding by the predator and the third term that follows from Eq (3) is the  
265 death rate of the pest due to consumption by frogs. Similarly, for Eq(4), the first term is the  
266 death rate of a predator in absence of prey while the second term is the predator's growth rate  
267 as they feed on the prey, and the last term is the death rate of the predator due to consumption  
268 by frogs.

269

### 270 **3. Results**

#### 271 **3.1 Statistical Analysis**

##### 272 **Control experiment**

273 The mixed effect models showed no significance in frog treatments for any of the five major  
274 paddy pest infestation types. However their abundance varied with the growth phases of  
275 paddy crop. Table 1 provides fixed effects in models for these 5 pest infestation types.

276 Pest abundance similarly showed a significant difference in the 2<sup>nd</sup> (p < 0.000), 3<sup>rd</sup>  
277 (p<0.000), and 4<sup>th</sup> phase (p<0.000) of sampling but none of the frog treatments had any  
278 significant effect (5 frog treatment p=.077; 10 frog treatment p=0.369).

279 Pest predator abundance appeared to be significantly affected by different phases of paddy  
280 growth i,e the 2<sup>nd</sup> (p< 0.000), 3<sup>rd</sup> (p< 0.000), and 4<sup>th</sup> (p=0.006) sampling phases. But, the

281 abundance of these pest predators was also significantly affected by the lower density of  
 282 frogs (5 frog treatment  $p=0.016$ ; 10 frog treatment  $p= 0.159$ ) (Table 2).  
 283 Figure 1 shows a prominent difference in the pest predator dynamics compared to the  
 284 respective abundance in the control plot. Since the resource available for the crop pests across  
 285 the treatment is the same (Kruskal Wallis chi-squared = 2.9454,  $df = 2$ ,  $p$ -value = 0.229), and  
 286 other external factors remaining similar, such difference in pest and predator build-up can  
 287 only occur due to the harvesting factor from frogs. However, this harvesting factor is proved  
 288 to be limited in the Functional Response analysis presented in the following section.

### 289 3.2 Functional response from a mesocosm experiment

290 Diagnostic tests indicated the feeding response pattern in our focal frog species to be  
 291 Holling’s Type II. We further built a model with attack rate and handling time, keeping  
 292 exponential co-efficient “ $q$ ” fixed at 0. The results showed a significant effect of handling  
 293 time ( $p = 0.000$ ) that validates our initial finding that the functional response is of Hollings’s  
 294 Type II (Fig. 2). Therefore, our results show, that frogs, as predators don’t have an insatiable  
 295 hunger but have a constant rate of feeding that is independent of prey density.

### 296 3.3 Assessment of trophic cascade through Mathematical growth model

297 For equations, 3 and 4 to be a non-trivial solution,  $x_1 \neq 0$  and  $x_2 \neq 0$ ,

$$298 \quad a_1 - b_1 x_2 - \frac{\left(\frac{nm}{T}\right)}{m_1 x_1 + m_2 x_2} = 0 \quad \dots\dots\dots(3.1)$$

$$299 \quad - a_2 + b_2 x_1 - \frac{\left(\frac{nm}{T}\right)}{m_1 x_1 + m_2 x_2} = 0 \quad \dots\dots\dots (4.1)$$

300 which describe the final steady-state, i.e.  $dx_1/dt = 0 = dx_2/dt$ . Thus on solving Eqs.(3.1,4.1)  
 301 for the two unknowns,  $x_1$  and  $x_2$ , we get uniquely,

$$302 \quad x_2 = \frac{a_1}{b_1} - \frac{\left(\frac{nm}{T}\right)}{b_1[m_1 x_1 + m_2 x_2]} \leq \frac{a_1}{b_1} \quad \dots\dots\dots (5.1)$$

$$303 \quad x_1 = \frac{a_2}{b_2} + \frac{\left(\frac{nm}{T}\right)}{b_2[m_1 x_1 + m_2 x_2]} \geq \frac{a_2}{b_2} \quad \dots\dots\dots (5.2)$$

304 In absence of frogs, the solutions would be,

305  $x_2 = \frac{a_1}{b_1}$  and  $x_1 = \frac{a_2}{b_2}$

306 which, as expected, are also the average values

307  $\langle x_1 \rangle = \left(\frac{1}{T}\right) \int x_1(t) dt = \left(\frac{a_2}{b_2}\right)$ ,  $\langle x_2 \rangle = \left(\frac{1}{T}\right) \int x_2(t) dt = \left(\frac{a_1}{b_1}\right)$  for the usual Lotka-

308 Volterra case, around which  $x_1(t)$  and  $x_2(t)$  evolve in their limit cycle, where the integrals are

309 over  $0 \leq t < T$  and  $T$  is sufficiently large. Our mathematical model, as of now, does not

310 explore the possibilities of limit cycles but shows that in presence of a frog as a tertiary

311 consumer, the trophic cascade effect would be negative for beneficial pest predators and

312 would have positive feedback on crop pest population.

313

314

#### 315 **4. Discussion**

316 As our study reveals, although frogs consumed pests, the existing field densities of frogs in

317 our study region (Ghosh and Basu, 2020) are insufficient for significant pest regulation in the

318 natural environment. This holds true for both the high and low agricultural intensification

319 areas. Even at the highest field-realistic density of frogs as found in the low agricultural

320 intensity areas, pest population was not affected.

321 That the frogs do consume insect pests have been reported earlier (Hirai and Matsui, 2002;

322 Chen et al., 2005; Attademo et al., 2005; Yousaf et al., 2010). Teng et al. (2016) also showed

323 that a density of 100 frogs/67sq. m and 150 frogs/ 100sq. m could effectively control pests.

324 The ineffectiveness of frogs in controlling the insect population in our case could be due to

325 the inadequate abundance of frogs i.e., below the threshold density for effective regulation, in

326 the study sites.

327 Like any pest control strategy, the goal of a biological control strategy is to keep the pest

328 population below an economic threshold level (ETL). Though stomach content analysis gives

329 evidence towards amphibians contributing to pest consumption, drawing a conclusion about  
330 their ability to reduce pest load below ETL based on such information will be presumptuous.  
331 Although studies have reported a reduction in pest load in presence of frogs in a controlled  
332 setup (Teng et al., 2016; Fang et al., 2019) these studies overlooked the impact on other  
333 arthropod natural predators as found in natural settings.  
334 We argue that frogs negatively impact the arthropod natural predators of crop pests in  
335 multiple species systems and that makes them ineffective as a biological pest regulator.

### 336 **Antagonistic interaction with other natural enemies**

337 We observed crop pests belonging to orders Orthoptera, Coleoptera, Lepidoptera,  
338 Hymenoptera, Diptera, Hemiptera, and arthropod predators belonged to orders Odonata,  
339 Coleoptera, and Aranea. Such rice fields provide a potential ecosystem with huge prey  
340 diversity (Fernando, 1995; Guerra and Araoz, 2015).

341 Our study shows that, in a multiple species system amphibians exhibited a preference for  
342 pest predators rather than crop pests. Brown (1974) has reported the diet of amphibians in  
343 croplands to be dominated by non-pests (94% of diet). Similar study by Khatiwada et al.  
344 (2016) also shows amphibian diet is significantly composed of natural pest predators.  
345 Generalist predators have an antagonistic effect in biological control especially (Perez-  
346 Alvarez, Nault, & Pavedo, 2019) where the predation pressure is equal on all the prey species  
347 (Wells, 2007). The effect and strength of intraguild predation with respect to frogs have not  
348 been reported prior to this study. However, our study is the first to experimentally  
349 demonstrate the effect and strength of intraguild predation with respect to frogs.

350 Our mathematical growth model corroborates our result and shows that with a limited feeding  
351 rate the presence of frogs will always have a negative effect on the insect predator population  
352 when they behave as a tertiary consumer in a system with both crop pests and arthropod  
353 predators. If frogs feed on insect pests only, according to the growth equation for natural pest

354 predators (Eq. 4) their growth rate would decrease as they are robbed off their resource, and  
355 eventually, there would be an increase in crop pest abundance. However, if the harvesting  
356 factor is shifted completely towards the crop pest predator (Eq. 3) (if they were not  
357 generalists but specialists instead, or if their feeding is influenced by the more active  
358 predators (Ahmed et al., 2016)) there still would be an increase in crop pest abundance due to  
359 release of interspecific interaction from pest predator population. Therefore the presence of  
360 frogs will cause negative feedback on the crop pest predator population consequently  
361 resulting in an increase in crop pest abundance. In intensive agricultural lands where the  
362 arthropod pest predator population is disproportionately affected (Zhao et al, 2015) or is low  
363 (Perez-Alvarez et al., 2019) amphibians could be a promising biological control agent.  
364 Martin et al. (2013) estimated a decrease in natural pest control by 46% in landscapes that are  
365 dominated by cultivatable arable lands. In such landscapes with impaired natural pest control  
366 by insect predators, the harvesting factor of frogs will be shifted maximally to the crop pest  
367 population.

### 368 **Feeding constraints of amphibians**

369 As our experimental result about the functional response shows, the feeding rate of *F.*  
370 *limnocharis* is independent of prey density and the response is significantly affected by  
371 handling time. Handling time ( $T_h$ ) is associated with every prey item consumed and is  
372 indifferent to the prey density. But even when the frog was presented with a higher density of  
373 grasshoppers, the maximum number of prey consumed was determined by the time spent in  
374 prey handling ( $T/T_h$ ). This means that the rate of prey consumption by a predator declines at  
375 higher prey densities due to handling constraints (Thorp et al., 2018). Therefore, this feeding  
376 constraint of the frog will act as a limiting factor in controlling the pest population at a higher  
377 density which will continue to grow in a single trophic interaction between crop pest and

378 frog. For effective biological control, a considerable abundance of the amphibian species  
379 needs to be conserved in intensive agricultural lands.

380

381 Scientific management of beneficial landscape structures like semi-natural habitats,  
382 hedgerows, ephemeral water bodies, degree of connectivity with adjoining remnant natural  
383 vegetation, and habitat heterogeneity (Ghosh and Basu, 2020) enhances amphibian thriving.  
384 Complex landscapes could weaken the strength of the intraguild predatory effects by  
385 reducing niche overlap through spatial separation or even alternate resource availability  
386 (Perez-Alvarez et al., 2019). Restoring the habitat diversity can therefore be expected to  
387 promote service provisioning.

388

389 Our research significantly adds to the existing body of work exploring the potential of frogs  
390 in biological control, particularly in tropical agroecological landscapes that are heavily  
391 dependent on intensification of paddy cultivation to sustain their burgeoning populations  
392 (Aditya et al. 2020). Our study highlights the importance of studying intraguild predation  
393 effect as an important factor that determines the effectiveness of frogs as biological control  
394 agents and highlights the importance of increasing the habitat diversity in the agricultural  
395 landscape to weigh down the impacts of intraguild predation and to improve the overall ES  
396 potential of natural predators, that has implications for food and livelihood security of  
397 communities dependent on agriculture.

398

#### 399 **Authors' Contribution**

400 PB and DG have conceived the idea and methodology; DG collected and analyzed data; SC  
401 and DG developed the mathematical models: PB, DG and SC contributed to writing the



402 manuscript. All authors have made significant contributions to preparing the manuscript and  
403 give approval for publication.

404

#### 405 **Acknowledgment**

406 We thank Prof. Santanu Jha and his team from Bidhan Chandra Krishi Viswavidyalaya for  
407 their help in insect and pest infestation identification. We also thank Mr. Sivaraman T.N.  
408 of Ongil for his initial contribution to computational work related to the population model  
409 build-up. We acknowledge Arnab Chakraborty for his support during the fieldwork.

410

#### 411 **Funding**

412 This work was supported by a fellowship from the Council of Scientific and Industrial  
413 Research (CSIR), Govt. of India, and a research grant from Rufford Small Grants, UK  
414 (22263-2) to the first author.

415

#### 416 **References**

417

- 418 Aditya, V., Sumashini, P. S., Aravind, N. A., Ravikanth, G., Krishnappa, C., & Shaanker, R.  
419 U. 2020. Reconciling biodiversity conservation with agricultural intensification: challenges  
420 and opportunities for India. *Current Science* 118 (12), 1870-1873.
- 421 Ahmed, K.S., Majeed, M.Z., Haidary, A.A., Haider, N. 2016. Integrated pest management  
422 tactics and predatory coccinellids: A review. *J. Entomol. Zool. Stud.* 4(1), 591-600.
- 423 Alexander, N., Moyeed, R., Stander, J. 2000. Spatial modelling of individual-level  
424 parasite counts using the negative binomial distribution. *Biostatistics.* 1(4), 453-463.  
425 <https://doi.org/10.1093/biostatistics/1.4.453>.

- 426 An, H., Liu, M.D., Wang, Y.J., Yan, Y. 2012. Effects of different rice-crab production modes  
427 on soil labile organic carbon and enzyme activities. *Acta Ecologica Sinica*. 32, 4753–4761 (in  
428 Chinese).
- 429 Arntzen, J.W., Abrahams, C., Meilink, W.R.M., Losif, R., Zuiderwijk, A. 2017. Amphibian  
430 decline, pond loss and reduced population connectivity under agricultural intensification over  
431 a 38 year period. *Biodivers. Conserv.* 26(6), 1411–1430. [https://doi.org/10.1007/s10531-017-](https://doi.org/10.1007/s10531-017-1307-y)  
432 1307-y
- 433 Attademo, A., Peltzer, P., Lajmanovich, R. 2005. Amphibians occurring in soybean and  
434 implications for biological control in Argentina. *Agric. Ecosyst. Environ.* 106, 389-394.  
435 [10.1016/j.agee.2004.08.012](https://doi.org/10.1016/j.agee.2004.08.012).
- 436 Balmford, A., Green, R., Phalan, B. 2012. What conservationists need to know about  
437 farming. *Proc. Biol. Sci.* 279(1739), 2714–2724. <https://doi.org/10.1098/rspb.2012.0515>.
- 438 Bengtsson, J. 2015. Biological control as an ecosystem service: partitioning contributions of  
439 nature and human inputs to yield. *Ecol. Entomol.* 40 (S1), 45-55.  
440 <https://doi.org/10.1111/een.12247>
- 441 Birkhofer, K., Diehl, E., Andersson, J., Ekroos, J., Früh-Müller, A., Machnikowski, F.,  
442 Mader, V., Nilsson, L., Sasaki, K., Rundlöf, M. et al. 2015. Ecosystem services - current  
443 challenges and opportunities for ecological research. *Front. Ecol. Evol.* 2, 1 - 12.  
444 [10.3389/fevo.2014.00087](https://doi.org/10.3389/fevo.2014.00087).
- 445 Brook, B., Sodhi, N., Bradshaw, C. 2008. Synergies among extinction drivers under global  
446 change. *Trends Ecol. Evol.* 23, 453-60. [10.1016/j.tree.2008.03.011](https://doi.org/10.1016/j.tree.2008.03.011).
- 447 Brown, R.L. 1974. Diets and habitat preferences of selected anurans in Southeastern  
448 Arkansas. *Am. Midl. Nat.* 468-473.

- 449 Chen, H., Chen, Z., Zhou, Y. 2005. Rice water weevil (Coleoptera: Curculionidae) in  
450 mainland China: Invasion, spread and control. *Crop protection*. 24(8), 695-702.  
451 <https://doi.org/10.1016/j.cropro.2004.12.005>.
- 452 Chuang, M-F., Borzée, A. 2019. *Fejervarya limnocharis* (Asian Rice Frog). *Diet. Herpetol.*  
453 *Rev.*, 50. 336.
- 454 Dash, M.C., Mahanta, J.K. 1993. Quantitative analysis of the community structure of tropical  
455 amphibian assemblages and its significance to conservation. *J. Biosci.* 18, 121–139.  
456 <https://doi.org/10.1007/BF02703044>.
- 457 Davies, B., Biggs, J., Williams, P., Whitfield, M., Nicolet, P., Sear, D., Bray, S., Maund, S.  
458 2008. Comparative biodiversity of aquatic habitats in the European agricultural landscape.  
459 *Agric. Ecosyst. Environ.* 125,1–8. <https://doi.org/10.1016/j.agee.2007.10.006>
- 460 Dudley, N., Alexander, S. 2017. Agriculture and biodiversity: a review. *Biodiversity*. 18, 2-  
461 3, 45-49, DOI: 10.1080/14888386.2017.1351892
- 462 Fang, K., Yi, X., Dai, W., Gao, H., Cao, L. 2019. Effects of Integrated Rice-Frog Farming on  
463 Paddy Field Greenhouse Gas Emissions. *Int. J. Environ. Res. Public Health*. 16, 1930.
- 464 Fatahuddin, F., Melina, M., Fatmawaty, F., Sulaeha, S. 2020. The population density of  
465 arthropods in the rice field ecosystem with insecticide application. *IOP Conf. Series: Earth*  
466 *and Environmental Science* 486, 012163. doi:10.1088/1755-1315/486/1/012163.
- 467 Fernando, C.H. 1995. Rice fields are aquatic, semi-aquatic, terrestrial and agricultural: A  
468 complex and questionable limnology. *Trop. Ecol.* 1, 121-148.
- 469 Firbank, L., Elliott, J., Drake, B., Cao, Y., Gooday, R. 2013. Evidence of sustainable  
470 intensification among British farms. *Agric. Ecosyst. Environ.* 173, 58-65.  
471 [10.1016/j.agee.2013.04.010](https://doi.org/10.1016/j.agee.2013.04.010).

- 472 Ghosh, D., Basu, P. 2020. Factors influencing herpetofauna abundance and diversity in a  
473 tropical agricultural landscape mosaic. *Biotropica*. 52(5), 927-937.  
474 <https://doi.org/10.1111/btp.12799>
- 475 Gibbs, J.P., Whiteleather, K.K., Scheuler, F.W. 2005. Change in frog and toad populations  
476 over 30 years in New York State. *Ecol. Appl.* 15,1148-1157.
- 477 Guerra, C., Aráoz, E. 2015. Amphibian diversity increases in an heterogeneous agricultural  
478 landscape. *Acta Oecol.* 69, 78-86. 10.1016/j.actao.2015.09.003.
- 479 Gurr, G., Wratten, S., Luna, J. 2003. Multi-function agricultural biodiversity: Pest  
480 management and other benefits. *Basic Appl. Ecol.* 4. 10.1078/1439-1791-00122.
- 481 Hamer, A.J., Makings, J.A., Lane, S.J., Mahony, M.J. 2004. Amphibian decline and  
482 fertilizers used on agricultural land in south-eastern Australia. *Agric. Ecosyst. Environ.* 102,  
483 299–305.
- 484 Hirai, T., Matsui, M. 2000. Feeding habits of the Japanese tree frog, *Hyla japonica*, in the  
485 reproductive season. *Zool. Sci.* 17(7), 977-982.
- 486 Clarke, B., Murray, J., Johnson, M.S. 1984. The extinction of endemic species by a program  
487 of biological control. *Pac. Sci.* 38(2), 97–104.
- 488 Howarth, F.G. 1991. Environmental impacts of classical biological control. *Annu. Rev.*  
489 *Entomol.* 36,489–509.
- 490 Howarth, F.G. 1983. Classical biological control: panacea or Pandora's box.  
491 *Proc. Hawaii. Entomol. Soc.* 24,239–244.
- 492 IUCN(International Union for Conservation of Nature), Conservation International and  
493 NatureServe. [Accessed 6 Jan 2008];Global amphibian assessment. 2006 Available via  
494 [www.globalamphibians.org](http://www.globalamphibians.org).
- 495 Ives, A.R., Gross, K., Jansen, V.A.A. 2000. Periodic mortality events in predator–prey  
496 systems. *Ecology.* 81, 3330–3340.

- 497 Khatiwada, J.R., Ghimirec, S., Khatiwad, S.P., Paudel, B., Bischo, R., Jianga, J.,  
498 Haugaasen, T. 2016. Frogs as potential biological control agents in the rice fields of Chitwan,  
499 Nepal. *Agric. Ecosyst. Environ.* 230, 307–314.
- 500 Knutson, M. G., Richardson, W.B., Reineke, D.M., Gray, B.R., Parmelee, J.R., Weick, S.E.  
501 2004. Agricultural ponds support amphibian populations. *Ecol. Appl.* 14, 669–684.
- 502 Lajmanovich, R., Sandoval, M., Peltzer, P. 2003. Induction of Mortality and Malformation in  
503 *Scinax Nasicus* Tadpoles Exposed to Glyphosate Formulations. *Bull. Environ. Contam.*  
504 *Toxicol. B.* 70, 612-8. [10.1007/s00128-003-0029-x](https://doi.org/10.1007/s00128-003-0029-x).
- 505 Li, C.F., Cao, C.G., Xu, Y.H., Wang, J.P., Zhang, M., Yang, X.W., Pang, H.D. 2008.  
506 Dynamics of soil microbial biomass N and soil enzymes activities in rice-duck and rice-fish  
507 ecosystems. *Acta Ecologica Sinica.* 28, 3905–3912 (in Chinese).
- 508 Lindén, A., Mäntyniemi, S. 2011. Using the negative binomial distribution to model over  
509 dispersion in ecological count data. *Ecology.* 92(7), 1414-1421. [https://doi.org/10.1890/10-](https://doi.org/10.1890/10-1831.1)  
510 1831.1.
- 511 Loman, J., Lardner, B. 2006. Does pond quality limit frogs *Rana arvalis* and *Rana*  
512 *temporaria* in agricultural landscapes? A field experiment. *J. Appl. Ecol.* 43, 690–700.
- 513 Van Leeuwen, E., Jansen, V.A.A., Bright, P.W. 2007. How Population Dynamics Shape the  
514 Functional Response in a One-Predator-Two-Prey System. *Ecology.* 88(6), 1571-1581.
- 515 Mahan, R.D., Johnson, J.R. 2007. Diet of the gray treefrog (*Hyla versicolor*) in relation to  
516 foraging site location. *J. Herpetol.* 41, 16-23. [http://dx.doi.org/10.1670/0022-](http://dx.doi.org/10.1670/0022-1511(2007)41[16:DOTGTH]2.0.CO;2)  
517 1511(2007)41[16:DOTGTH]2.0.CO;2.
- 518 Martin, E.A., Reineking, B., Seo, B., Steffan-Dewenter, I 2013. Natural enemy interactions  
519 constrain pest control in complex agricultural landscapes. *PNAS.* 110 (14), 5534-  
520 5539. <https://doi.org/10.1073/pnas.1215725110>.

521 Naeem, S., Ingram, J., Varga, A., Agardy, T., Barten, P., Bennett, G., Bloomgarden, E.,  
522 Bremer, L., Burkill, P., Cattau, M., Ching, C. 2015. Get the science right when paying for  
523 nature's services. *Science*. 1206-1207.

524 Newbold, T., et al. 2015. Global effects of land use on local terrestrial biodiversity. *Nature*.  
525 520, 45-50. [10.1038/nature14324](https://doi.org/10.1038/nature14324).

526 NICRA team of rice pest surveillance, 2011. Manual for Rice Pest Surveillance. Jointly  
527 published by National Centre for Integrated Pest Management, New Delhi, Central Research  
528 Institute for Dryland Agriculture and Directorate of Rice Research, Hyderabad. 40 pp.

529 Perez-Alvarez, R., Nault, B.A., Poveda, K. 2019. Effectiveness of augmentative biological  
530 control depends on landscape context. *Scientific Reports*. 9(1), 8664.

531 Pritchard, D., Paterson, R., Bovy, H., Barrios-O'Neill, D. 2017. Frair: an R package for  
532 fitting and comparing consumer functional responses. *Methods Ecol. Evol.* 8.  
533 [10.1111/2041-210X.12784](https://doi.org/10.1111/2041-210X.12784).

534 Schaefer, E.F., Hamann, M.I., Kehr, A.I., González, C.E., Duré, M. 2006. Trophic,  
535 reproductive and parasitological aspects of the ecology of *Leptodactylus*  
536 *chaquensis* (anura: Leptodactylidae) in Argentina. *J. Herpetol.* 16, 387-394.

537 Sumida, M., Kotaki, M., Islam, M.M., Hon, T.D., Igawa, T., Kondo, Y., Matsui, M., Silva,  
538 A., Khonsue, W., Nishioka, M. 2007. Evolutionary relationships and reproductive isolating  
539 mechanisms in the Rice frog (*Fejervarya limnocharis*) Species complex from Sri Lanka,  
540 Thailand, Taiwan and Japan, Inferred from mtDNA Gene Sequences, Allozymes, and  
541 Crossing Experiments. *Zool. Sci.* 24(6), 547-562.

542 Thorp, C.J., Alexander, M.E., Vonesh, J.R., Measey, J. 2018. Size-dependent functional  
543 response of *Xenopus laevis* feeding on mosquito larvae. *PeerJ*. 6,  
544 e5813. <https://doi.org/10.7717/peerj.5813>.

545 Tschamtker, T., Klein, A.M., Kruess, A., Steffan-Dewenter, I., Thies, C. 2005. Landscape  
546 perspectives on agricultural intensification and biodiversity: ecosystem service  
547 management. *Ecol. Lett.* 8, 857–874. (doi:10.1111/j.1461-0248.2005.00782.x).

548 R Core Team, 2018. R: A language and environment for statistical computing. R  
549 Foundation for Statistical Computing, Vienna, Austria. URL <https://www.R-project.org/>.

550 Teng, Q., Hu, X., Luo, F., Cheng, C., Ge, X., Yang, M., Liu, L. 2016. Influences of  
551 introducing frogs in the paddy fields on soil properties and rice growth. *J. Soils Sediments.*  
552 16, 51–61.

553 Thies, C., Roschewitz, I., Tschamtker, T. 2005. Landscape context of cereal aphid–parasitoid  
554 interactions. *Proc. Royal Soc. B.* 272, 203–210.

555 Tittone, P.A. 2014. Ecological intensification of agriculture — sustainable by nature. *Curr.*  
556 *Opin. Environ. Sustain.* 8, 53–61. 10.1016/j.cosust.2014.08.006.

557 Wells, K. 2007. *The Ecology and Behavior of Amphibians*. Bibliovault OAI Repository, the  
558 University of Chicago Press. 10.7208/chicago/9780226893334.001.0001.

559 Williams, R.J., Martinez, N.D. 2004. Limits to trophic levels and omnivory in complex food  
560 webs: theory and data. *Am. Nat.* 163(3), 458–468. <https://doi.org/10.1086/381964>.

561 Wilby, A., Thomas, M. 2002. Natural enemy diversity and pest control: Patterns of pest  
562 emergence with agricultural intensification. *Ecol. Lett.* 5, 353 - 360. 10.1046/j.1461-  
563 0248.2002.00331.x.

564 Wollrab, S., Diehl, S. 2015. Bottom-up responses of the lower oceanic food web are sensitive  
565 to copepod mortality and feeding behavior. *Limnol. Oceanogr.* 60,641–656.

566 Yousaf, S., Qureshi, T.M., Rias, M., Zia, I. 2010. Population variation and food habits of  
567 ranid frogs in rice the rice-based cropping system n Gujranwala region in Pakistan.  
568 *Asian Herpetol. Res.* 1, 122-130.

569 Zhang, M., Cao, C.G., Jiang, Y., Wang, J.P., Yue, L.X., Cai, M.L. 2010. Dynamics of active  
570 organic carbon in a paddy soil under different rice farming modes. Chinese Journal of  
571 Applied Ecology. 21, 2010–2016 (in Chinese).

572 Zhang, J.E. 2013. Progresses and perspective on research and practice of rice-duck farming in  
573 China. Chinese Journal of Eco-Agriculture. 01, 70–79 (in Chinese).

574 Zhao, Z., Hui, C., He, D., Li, B. 2015. Effects of agricultural intensification on ability of  
575 natural enemies to control aphids. Scientific Reports. 5, 10.1038/srep08024.

576

577

578

579

580

581

582

583

584

585

586

587

588

589

590

591



592

593

594

595

| <b>Pest/Disease</b> | <b>Fixed Effects</b> | <b>F value</b> | <b>p value</b> <sup>596</sup> |
|---------------------|----------------------|----------------|-------------------------------|
| <b>Tungro</b>       | Paddy growth phase   | 4.92 (3,20)    | 0.010* <sup>597</sup>         |
|                     | Frog treatment       | 1.09 (2,4)     | 0.41 <sup>598</sup>           |
| <b>Defoliation</b>  | Paddy growth phase   | 6.21 (3,20)    | 0.003** <sup>599</sup>        |
|                     | Frog treatment       | 1.21 (2,4)     | 0.38 <sup>600</sup>           |
| <b>Rice whorl</b>   | Paddy growth phase   | 2.08 (3,20)    | 0.13 <sup>601</sup>           |
|                     | Frog treatment       | 1.93 (2,4)     | 0.25 <sup>602</sup>           |
| <b>Leaf folder</b>  | Paddy growth phase   | 3.88 (3,22)    | 0.022* <sup>603</sup>         |
|                     | Frog treatment       | 0.73 (2,4)     | 0.53 <sup>604</sup>           |
| <b>Rice hispa</b>   | Paddy growth phase   | 70.17 (3,20)   | <.0001*** <sup>605</sup>      |
|                     | Frog treatment       | 2.32 (2,4)     | 0.21 <sup>606</sup>           |

Table 1: Fixed effects (Paddy growth phase and Frog treatment) in Nested ANOVA models for the five

608 pest infestation types

609

610

611

612

613

614

615

616

617

618

619

620

| Response           | Treatment |          | Paddy growth phase |                 |                 |                 |                 |
|--------------------|-----------|----------|--------------------|-----------------|-----------------|-----------------|-----------------|
| Response           | Control   | 10 frogs | 5 frogs            | 1 <sup>ST</sup> | 2 <sup>ND</sup> | 3 <sup>RD</sup> | 4 <sup>TH</sup> |
| Pest abundance     |           |          | 0.09               | 0.000           | 0.000           | 0.006           |                 |
| Predator abundance |           |          | 0.01               | 0.000           | 0.000           | 0.000           |                 |

621 Table 2: Summary of results from GLMM for pest and insect predator build-up in response to

622 frog treatments and paddy growth phase

623

624

625

626

627

628

629

630

631

632

633

634

635

636

637

638

639 Fig. 1.

640

641

642

643

644

645

646

647

648

649

650

651

652

653

654

655

656

657

658

659

660

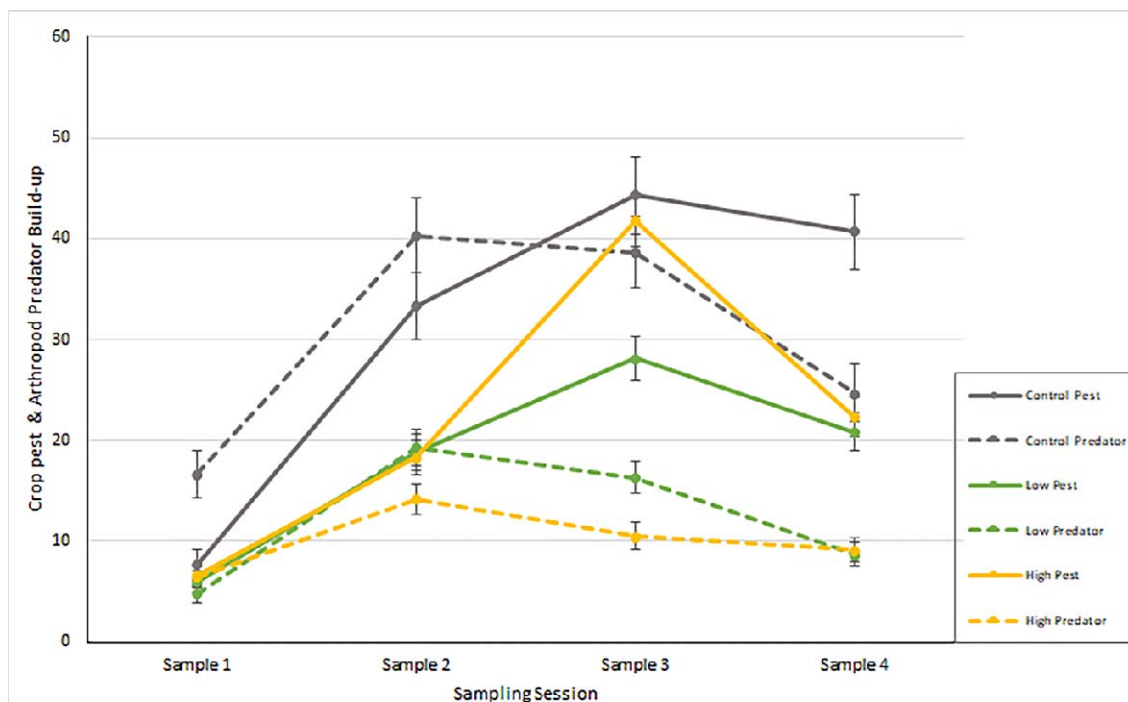

651

652

653

654

655

656

657

658

659

660 Fig 2.

661

662

663

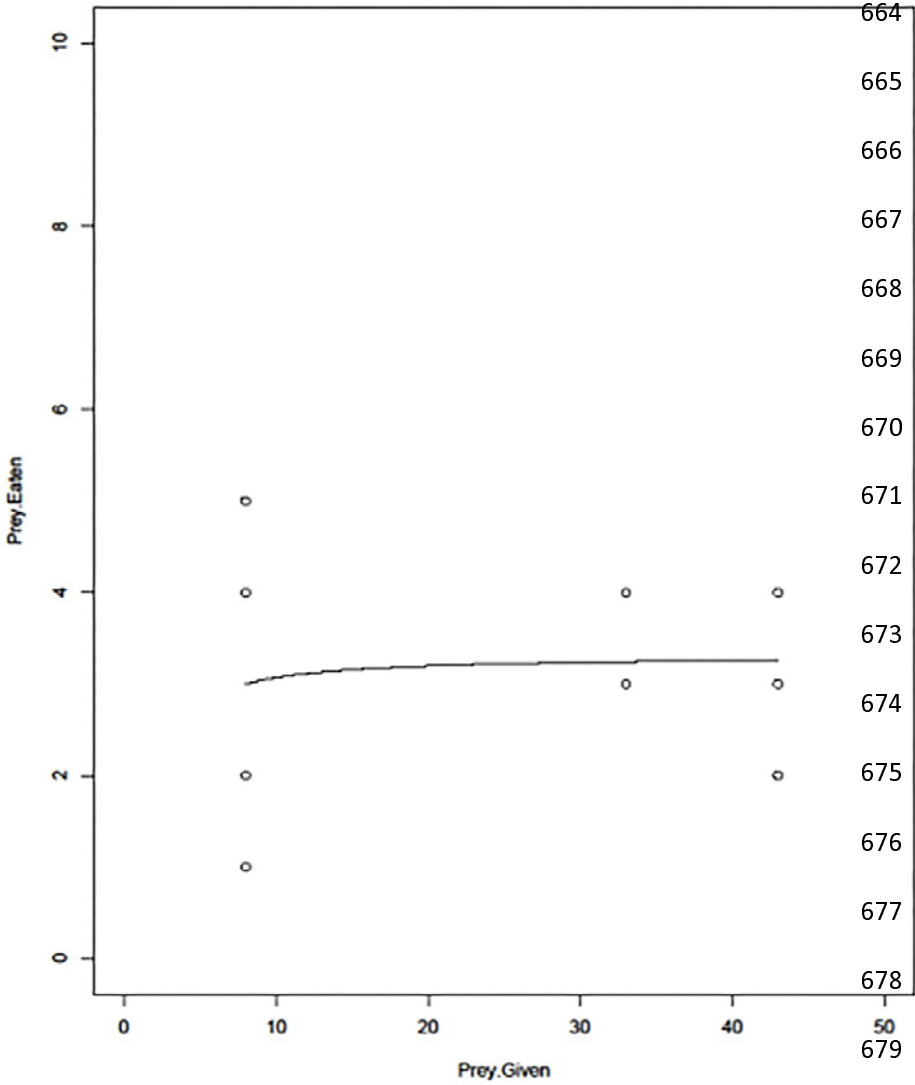

680

681

682

683

684

685

686

687 Figures:

688 Fig. 1. Crop pest and insect predator build-up in control, at frog densities found in High  
689 (10frogs/100 sq.m) and Low (5 frogs/100 sq.m) agricultural intensity areas at different  
690 sampling intervals.

691 Fig 2. Functional response output showing Holling's Type II feeding nature in focal frog  
692 species.

693

694

695

696
